# Supplementary material for: Inhibition of replication of hepatitis B virus using transcriptional repressors that target the viral DNA
Source: PubMed Central journal article supplement (PMC6739920; doi:10.1186/s12879-019-4436-y), 2019-09-12
Supplement: 12879_2019_4436_MOESM1_ESM.pdf [file 12879_2019_4436_MOESM1_ESM.pdf]

*Bpil*    *Pcil*

5' gcgatgtagaagacg**acatg**ttctttcctgcggtatcccctgattctgtggataaccgtattaccgccttgagtgagctgataccgctcgccgc  
agccgaacgaccgagcgcagcagtcagtgagcgcaggaagcgggaagagcgccaatacgcaaaccgcctctccccgcgcgttgg  
ccgattcattaatccagctggcacgacaggtttcccgactggaaagcgggcagtgagcgcacaacgcaattaatgtgagttacctcactcatt  
aggcaccaggtttacactttatgcttccggctcgtatgtgtgtggaattgtgagcggataacaatttcacacaggaaacagctatgacc  
atgattacgaattaac *tcgagagatctgtcgacaaaat*ttatcgatcacgagactagcctcgatcgaggtcaattcacgcgagttaataat  
accagcgcgggccaataaataatccgcgaggggaggtgacgtttgccagcgcgcgctggaattattaacctcggaatattgattc  
gagggccgcgattgccgcaatcgcgaggggaggtgacctttgccagcgcgcgctcgccccgccccggacggtatcgataagcttagg  
agcttgggctgcaggtcgagggcactgggaggatgttgagtaagatggaaaactactgatgacccttgcagagacagagtattaggac  
atgtttgaacaggggcccgggcgatcagcaggtagctctagaggatccccgtctgtctgcacatttcgtagagcgcgaggttccgatactctaa  
tctccctaggcaaggttcatattgtgtaggttacttattctcctttgttgactaagtcaataatcagaatcagcaggttggagtcagcttggca  
gggatcagcagcctgggttgaaggaggggtataaaagccccttcaccaggagaagccgtcacacagatccacaagctcctgccac  
catggtgagctagcgatcagg cgcgcatagagtctatggcccacccccttggttcgtagaacgcggctacaattaatacataacctat  
gtatcacacatacgatttaggtgacactatagaataacatccactttgccttctctccacaggtgtccactcccaggccaactgcacctc  
ggttctatcgattgaattgacatgtaccatacagatgtcccagactacgcgaattag**gcggccgcg**cttcatcatcgc 3'

*NotI*    *Bpil*

**Supplementary Figure 1. Synthesized sequence encompassing the MTTR promoter.** The MTTR promoter sequence, together with flanking regions containing *Bpil* (underlined), *Pcil* (bold) and *NotI* (bold) restriction sites were synthesized. The essential MTTR promoter is indicated in italic font with grey shading. After digestion with *Bpil*, sticky ends complementary to those of *Pcil* and *NotI* were generated to enable substitution of the CMV promoter with the MTTR promoter in SPL and SPR plasmids.

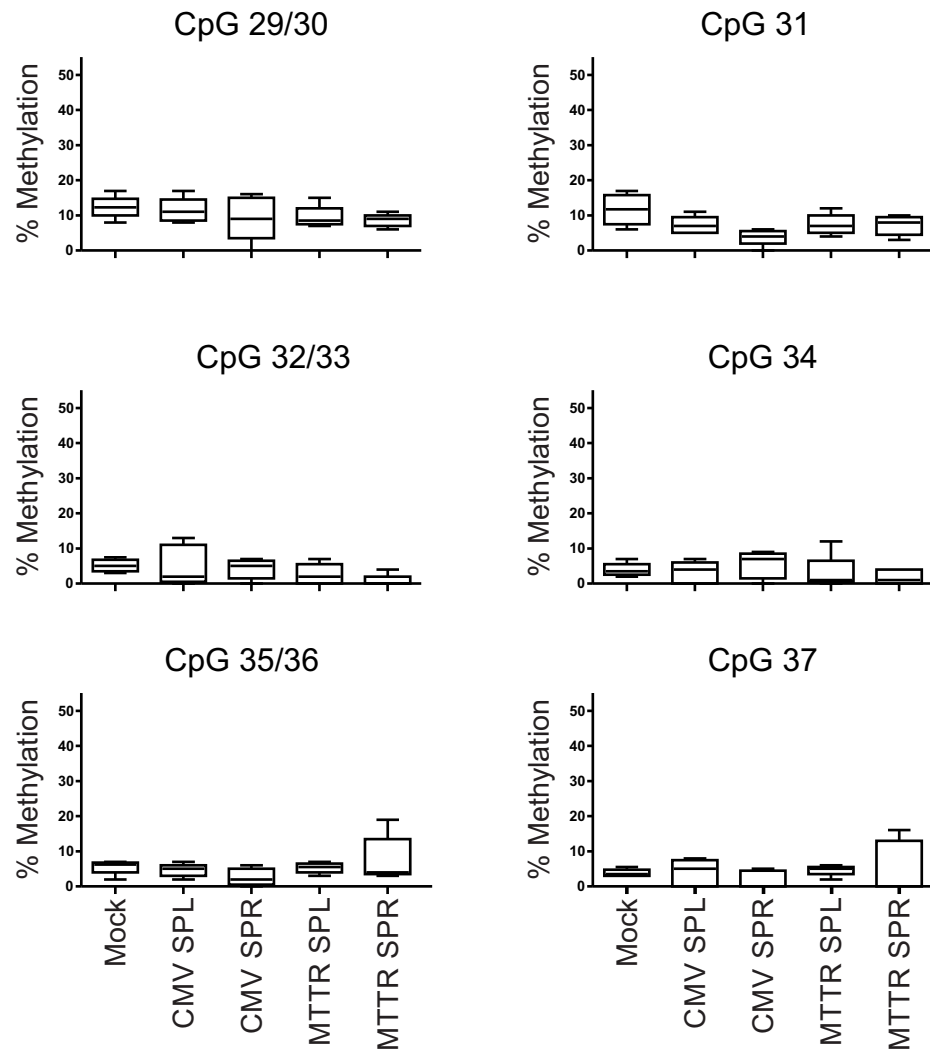

**Supplementary Figure 2.** Box and whiskers plot of the percentage methylation across CpG points 29 to 38 of HBV island II. Percentage methylation was determined by EpiTYPER MassARRAY on DNA extracted from mouse livers. An increase in the percentage methylation can be seen for MTTR-SPR at CpG positions 35/36 and 37. For CMV-SPL, CMV-SPR and MTTR-SPL, a 2-fold increase in methylation was measured at CpG position 38.
